# Supplementary material
Source: PubMed Central journal article supplement (PMC3660797)
Supplement: tlo0603_0290SD1.pdf [file tlo0603_0290SD1.pdf]

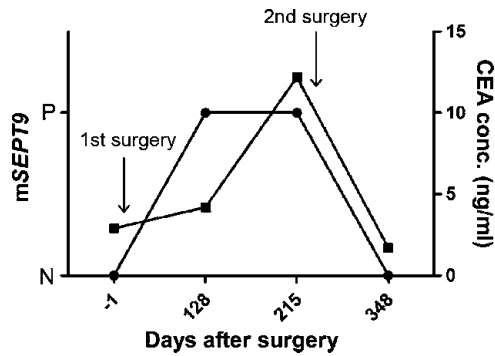

**Figure W1.** Plasma mSEPT9 and serum CEA concentrations in the patient with recurred CRC. mSEPT9 was negative and serum CEA was 2.9 ng/ml at 1 day before the first operation. At 128 days after the first operation, mSEPT9 was positive, but CEA was 4.2 ng/ml and clinical impression was abscess at anastomosis site by CT imaging. Serum CEA was 12.2 ng/ml at 215 days. Recurrence was diagnosed by the second operation at 217 days. Negative conversion of mSEPT9 was found after second operation (at 348 days; N, negative; P, positive; closed circle, mSEPT9; closed square, CEA concentration).

**Table W1.** Clinical Features of a Total of 101 CRC Patients according to Serum CEA Status.

|                    | CEA           |               | Total         | P Value |
|--------------------|---------------|---------------|---------------|---------|
|                    | ≥5 ng/ml      | <5 ng/ml      |               |         |
| Age                | 63.86 ± 11.45 | 63.53 ± 11.13 | 63.59 ± 11.14 | NS      |
| Gender             |               |               |               | .018    |
| Male               | 6 (11.5%)     | 46 (88.5%)    | 52            |         |
| Female             | 15 (30.6%)    | 34 (69.4%)    | 49            |         |
| TNM stage          |               |               |               | <.001   |
| 0/I                | 0 (0%)        | 26 (100%)     | 26            |         |
| II                 | 5 (16.7%)     | 25 (83.3%)    | 30            |         |
| III                | 6 (21.4%)     | 22 (78.6%)    | 28            |         |
| IV                 | 10 (58.8%)    | 7 (41.2%)     | 17            |         |
| Distant metastasis |               |               |               | <.001   |
| Absent             | 11 (13.1%)    | 73 (86.9%)    | 84            |         |
| Present            | 10 (58.8%)    | 7 (41.2%)     | 17            |         |
| mSEPT9             |               |               |               | .001    |
| Negative           | 7 (10.9%)     | 57 (89.1%)    | 64            |         |
| Positive           | 14 (37.8%)    | 23 (62.2%)    | 37            |         |
| Preoperative CCRT  |               |               |               | NS      |
| Not done           | 18 (20.9%)    | 68 (79.1%)    | 86            |         |
| Done               | 3 (20.0%)     | 12 (80.0%)    | 15            |         |
| Location of tumor  |               |               |               | NS      |
| Right colon        | 5 (23.8%)     | 16 (76.2%)    | 21            |         |
| Left colon         | 16 (20.0%)    | 64 (80.0%)    | 80            |         |
| Mean DFS (days)    | 400.3 ± 39.5  | 547.6 ± 9.5   | 517.5 ± 13.0  | <.001*  |
| Total              | 21 (20.8%)    | 80 (79.2%)    | 101           |         |

CCRT indicates chemoradiation; NS, not significant; DFS, disease-free survival.

\*By log-rank test of Kaplan-Meier survival curves.

**Table W2.** Clinical Features of a Total of 153 GC Patients according to Serum CEA and CA19-9 Status.

|                    | Total         | CEA          |               | P Value | CA19-9        |               | P Value |
|--------------------|---------------|--------------|---------------|---------|---------------|---------------|---------|
|                    |               | ≥5 ng/ml     | <5 ng/ml      |         | ≥27 U/ml      | <27 U/ml      |         |
| Age                | 60.31 ± 13.37 | 66.00 ± 7.59 | 59.73 ± 13.71 | NS      | 64.95 ± 13.88 | 59.53 ± 13.18 | NS      |
| Gender             |               |              |               |         |               |               | NS      |
| Male               | 91            | 11 (12.1%)   | 80 (87.9%)    | NS      | 13 (14.3%)    | 78 (85.7%)    |         |
| Female             | 62            | 3 (4.8%)     | 59 (95.2%)    |         | 9 (14.5%)     | 53 (85.5%)    |         |
| TNM stage          |               |              |               | .013    |               |               | .002    |
| 0/I                | 51            | 1 (2.0%)     | 50 (98.0%)    |         | 2 (3.9%)      | 49 (96.1%)    |         |
| II                 | 44            | 4 (9.1%)     | 40 (90.9%)    |         | 5 (11.4%)     | 39 (88.6%)    |         |
| III                | 40            | 4 (10.0%)    | 36 (90.0%)    |         | 8 (20.0%)     | 32 (80.0%)    |         |
| IV                 | 18            | 5 (27.8%)    | 13 (72.2%)    |         | 7 (38.9%)     | 11 (61.1%)    |         |
| Distant metastasis |               |              |               | .013    |               |               | .006    |
| Absent             | 135           | 9 (6.7%)     | 126 (93.3%)   |         | 15 (11.1%)    | 120 (88.9%)   |         |
| Present            | 18            | 8 (27.8%)    | 13 (72.2%)    |         | 7 (38.9%)     | 11 (61.1%)    |         |
| mSEPT9             |               |              |               | NS      |               |               | NS      |
| Negative           | 126           | 9 (7.1%)     | 117 (92.9%)   |         | 17 (13.5%)    | 109 (86.5%)   |         |
| Positive           | 27            | 5 (18.5%)    | 22 (81.5%)    |         | 5 (18.5%)     | 22 (81.5%)    |         |
| Location of tumor  |               |              |               | NS      |               |               | NS      |
| Lower third        | 95            | 9 (9.5%)     | 86 (90.5%)    |         | 15 (15.8%)    | 80 (84.2%)    |         |
| Middle third       | 37            | 4 (10.8%)    | 33 (89.2%)    |         | 5 (13.5%)     | 32 (86.5%)    |         |
| Upper third        | 21            | 1 (4.8%)     | 20 (95.2%)    |         | 2 (9.5%)      | 19 (90.5%)    |         |
| Mean DFS (days)    | 413.1 ± 8.5   | 293.2 ± 46.0 | 424.6 ± 7.4   | <.001*  | 344.4 ± 31.4  | 423.7 ± 8.1   | <.001*  |
| Total              | 153           | 14 (9.2%)    | 139 (90.8%)   |         | 22 (14.4%)    | 131 (85.6%)   |         |

NS indicates not significant; DFS, disease-free survival.

\*By log-rank test of Kaplan-Meier survival curves.
